1 **Title:** Rapid transmission of coronavirus disease 2019 within a religious sect in South Korea: a  
2 mathematical modeling study

3

4 **Authors:** Jong-Hoon Kim<sup>1\*</sup>, Hyojung Lee<sup>2,3+</sup>, Yong Sul Won<sup>2+</sup>, Woo-Sik Son<sup>2</sup>, and Justin Im<sup>1</sup>

5 <sup>1</sup>International Vaccine Institute, Seoul, South Korea

6 <sup>2</sup>National Institute for Mathematical Sciences, Daejeon, South Korea

7 <sup>3</sup>Department of Statistics, Kyungpook National University, Daegu 41566, South Korea

8

9 <sup>+</sup>Equal contribution

10

11 <sup>\*</sup>Corresponding author:

12 Jong-Hoon Kim

13 Email: [jonghoon.kim@ivi.int](mailto:jonghoon.kim@ivi.int); [kimfinale@gmail.com](mailto:kimfinale@gmail.com)

14 Postal address: International Vaccine Institute, SNU Research Park, 1 Gwanak-ro, Gwanak-gu,

15 Seoul, 08826 Korea

16

17

18

19

20

21

22

23

NOTE: This preprint reports new research that has not been certified by peer review and should not be used to guide clinical practice.

24

25     **Highlights**

- 26     • Basic reproduction number ( $R_0$ ) of COVID-19 in a religious community of Shincheonji Church  
27         of Jesus was estimated to be 8.5 [95% credible interval (CrI): 6.3, 10.9], which is more than 4  
28         times larger than the general population ( $R_0 = 1.9$  [95% CrI: 0.4, 4.4])
- 29     • There were estimated 4 [95% CrI: 2, 11] undetected cases when the index case from the religious  
30         community reported symptom on February 7.
- 31     • The Shincheonji Church cluster is likely to be emblematic of other outbreak-prone populations  
32         where  $R_0$  of COVID-19 is higher. Understanding and subsequently limiting the risk of  
33         transmission in such high-risk places is key to effective control.

34

35

36

37

38

39

40

41

42

43

44

45

46 **Abstract:** Rapid transmission of coronavirus disease 2019 (COVID-19) was observed in the  
47 Shincheonji Church of Jesus, a religious sect in South Korea. The index case was confirmed on  
48 February 18, 2020 in Daegu City, and within two weeks, 3,081 connected cases were identified.  
49 Doubling times during these initial stages (i.e., February 18 – March 2) of the outbreak were less than  
50 2 days. A stochastic model fitted to the time series of confirmed cases suggests that the basic  
51 reproduction number ( $R_0$ ) of COVID-19 was 8.5 [95% credible interval (CrI): 6.3, 10.9] among the  
52 church members, whereas ( $R_0 = 1.9$  [95% CrI: 0.4, 4.4]) in the rest of the population of Daegu City.  
53 The model also suggests that there were already 4 [95% CrI: 2, 11] undetected cases of COVID-19  
54 on February 7 when the index case reportedly presented symptoms. The Shincheonji Church cluster  
55 is likely to be emblematic of other outbreak-prone populations where  $R_0$  of COVID-19 is higher.  
56 Understanding and subsequently limiting the risk of transmission in such high-risk places is key to  
57 effective control.

58 **Keywords:** COVID-19; Korea; Shincheonji Church; transmission model; reproduction number

59

60

61

62

63

64

65

66

67

## 68 **1. Introduction**

69 Coronavirus disease 2019 (COVID-19) has become a global pandemic since it was first reported in  
70 Wuhan, China in December 2019 with the name of novel coronavirus disease (Li et al., 2020a). The  
71 causative agent, severe acute respiratory syndrome coronavirus 2 (SARS-CoV-2), transmits mainly  
72 through human-to-human contact (Chan et al., 2020), which can happen even during the infector is  
73 asymptomatic (Rothe et al., 2020; Yu et al., 2020). Infection with the virus causes diseases with  
74 varying degree of symptoms including death (Fu et al., 2020; Guan et al., 2020). Infection mortality  
75 ratio is lowest among children aged between 5 and 9 years and increases loglinearly with age  
76 (O'Driscoll et al., 2021).

77

78 One key characteristic of COVID-19 pandemic is that transmission events in high-risk settings such  
79 as super-spreading events (SSEs) contribute to most transmissions (Adam et al., 2020; Lemieux et  
80 al., 2020). The risk of COVID-19 transmission is believed to high in places with high occupancy and  
81 poor ventilation (Jones et al., 2020). One extreme example is the outbreak in the Diamond Princess  
82 cruise ship, where 17% (619/3711) of the passengers were infected from January 25 to February 20,  
83 2020 (Russell et al., 2020). Other examples include transmission events in bars and wedding (Adam  
84 et al., 2020) in Hong Kong, nursing homes in U.S. (Chen et al., 2021), telemarketers working in group  
85 in closed places (Park et al., 2020) and fitness classes (Jang et al., 2020) in South Korea, and also  
86 religious gatherings, which we describe below.

87

88 Explosive spread of COVID-19 was observed in the Shincheonji Church of Jesus (“Shincheonji”), a  
89 religious sect in South Korea. The index case was confirmed on February 18, 2020 and within two  
90 weeks, 3,081 connected cases were identified (Korea Disease Control and Prevention Agency,  
91 2020a). A simple calculation reveals that the outbreak size doubled in less than every 2 days  
92 ( $14/\log_2(3081) \approx 1.21$ ), which is smaller than doubling times reported in the early stages of the  
93 COVID-19 outbreak in China (2.5 and 3.1 days in Hubei Province and Hunan Province, respectively)

94 (Muniz-Rodriguez et al., 2020b), Spain (2.8 days) (Guirao, 2020), the US (2.7 days) (Lurie et al.,  
95 2020), and Korea (2.8 – 10.2 days) (Shim et al., 2020b). A total of 6,684 confirmed cases were  
96 reported in Daegu City as of March 31, 2020 of which 4,467 (66.8%) were Shincheonji members,  
97 representing close to half (47.9%, 4,467/9,334) of the city’s total Shincheonji membership.

98

99 Previous studies highlighted that COVID-19 transmissions involve SSEs (Xu et al., 2020), which can  
100 play a key role in sustained community transmissions (Adam et al., 2020; Lemieux et al., 2020).  
101 However, there have been no attempts to model the dynamics of COVID-19 transmission within high-  
102 risk settings and their interaction with the general community. In this study, we modeled the outbreak  
103 in the Shincheonji community while accounting for its interaction with the rest of population. We  
104 used the stochastic model to account for the stochastic nature of the transmission events. We used the  
105 model to explore the differences in the basic reproduction number ( $R_0$ ) between the high-risk setting  
106 and the general community, and quantify uncertainties related to the initial conditions and dynamics  
107 of transmission under the dynamic intervention programs.

## 108 **2. Materials and Methods**

### 109 *2.1 Background on the Shincheonji Church of Jesus*

110 Shincheonji was founded by Man-hee Lee in 1984 and has approximately 245,000 members including  
111 30,000 foreigners (Chung and Hill, 2020). At Shincheonji gatherings, worshipers used to sit close  
112 together on the floor and facial coverings, such as glasses and face masks, are forbidden. Members  
113 were expected to attend services despite illness (Choe, 2020). The index case of the Daegu City  
114 outbreak was identified as a Shincheonji member and some 1,000 people were reported to have  
115 attended worship together (Yonhap, 2020). Further tracing of church members identified clustering  
116 in apartment complexes. Of 142 residents in a particular Daegu apartment block, 94 (66%) were  
117 Shincheonji members of whom 46 (38.9%) tested positive for the virus (Myung, 2020).

### 118 *2.2 Data*

119 Time series of patients confirmed with COVID-19 in Shincheonji community and the overall Daegu  
120 City over the period of 19 February – 31 March 2020 was compiled based on the daily reports from  
121 Korea Disease Control and Prevention Agency (KDCA) (Korea Disease Control and Prevention  
122 Agency, 2020a) (Figure 1). The reports provide the number of cases confirmed with SARS-CoV 2  
123 based on reverse transcription polymerase chain reaction (RT-PCR) by category (Shincheonji or non-  
124 Shincheonji). We made some adjustments to the existing data before we fit the model. First, in the  
125 beginning of the outbreak, KDCA provided both daily and cumulative numbers of cases confirmed  
126 for SARS-CoV 2, which did not agree always. If there is a discrepancy between these numbers, we  
127 prioritized cumulative numbers as this figure was reported continuously throughout the outbreak.  
128 Second, data were missing for some days for the number cases for Shincheonji members. We imputed  
129 missing values using the cubic spline method (Figure S1 in the Supplementary Material).

130

### 131 2.3. Doubling time

132 The epidemic doubling time ( $T_d$ ) represents the duration in which the cumulative incidence doubles.  
133 Assuming exponential growth with a constant epidemic growth rate ( $r$ ), the epidemic doubling time  
134 can be calculated by the following equation (Anderson et al., 2020; Lurie et al., 2020; Muniz-  
135 Rodriguez et al., 2020a)

$$T_d = \frac{\ln(2)}{r}. \quad (1)$$

136 Epidemic growth rate ( $r$ ) may be estimated based on the data. For example,  $r(t)$  can be estimated  
137 by the following equation:

138

139

$$r(t) = \frac{\ln(C(t)) - \ln(C(t - \Delta t))}{\Delta t}, \quad (2)$$

140

141 where  $C(t)$  indicates the cumulative number of infected people at time  $t$  and  $\Delta t$  is the duration over  
142 which  $r(t)$  is assumed to be constant.  $r(t)$  can be calculated over the fixed time interval (e.g., 1 day  
143 or 1 week) (Ebell and Bagwell-Adams, 2020; Patel and Patel, 2020) or variable time intervals (e.g.,  
144 days on which the number of cases doubles, quadruples, etc.) (Muniz-Rodriguez et al., 2020a; Shim  
145 et al., 2020b). We calculated doubling based on prior 7 days or 1 day from 18 February to 5 March  
146 2020, when the epidemic peaked and no further doubling of cumulative number of cases occurred  
147 onward.

148

149 The basic reproduction number ( $R_0$ ) is defined as the average number of secondary cases caused by  
150 a single infected case in an entirely susceptible population and it provides sufficient information to  
151 produce doubling times in the beginning of an outbreak. However, estimating  $R_0$  requires additional  
152 information such as generation time or developing a mechanistic model, and its estimates come with  
153 higher degree of uncertainty (Anderson et al., 2020). Calculating doubling times requires fewer  
154 assumptions and also allows us to compare our results with estimates from different settings where  
155 doubling times, but not reproduction numbers, are available.

#### 156 *2.4. Mechanistic model of COVID-19 transmission*

157 We developed a stochastic model of COVID-19 transmission within the Shincheonji community and  
158 the overall population of Daegu City. The model includes six disease states: susceptible ( $S$ ), exposed  
159 but not infectious ( $E$ ), pre-symptomatic but infectious ( $P$ ), symptomatic and infectious ( $I$ ),  
160 asymptomatic but infectious ( $A$ ), confirmed and isolated ( $C$ ), and recovered ( $R$ ). The model includes

161 two patches to model Shincheonji and non-Shincheonji people, separately. Transmission rates may  
162 differ for each patch and person from one patch may infect people from the other patch. (Figure 2).

163

164 This modeling framework of mixing between two distinct sub-populations has been adopted in  
165 previous works, ranging from sexually transmitted diseases (Koopman et al., 1988) to vector-borne  
166 diseases such as dengue (Lee and Castillo-Chavez, 2015), where formulations for mixing between  
167 patches vary. We adopted the formulation used in the work on modeling transmission of cholera  
168 between hotspot and non-hotspot areas (Azman and Lessler, 2015). Mixing between two sub-  
169 populations are defined by the  $2 \times 2$  contact matrix,

170 
$$C = \begin{pmatrix} c_{11} & c_{12} \\ c_{21} & c_{22} \end{pmatrix},$$

171 where  $c_{ij}$  indicates the fraction of time that individuals from patch  $i$  spends in patch  $j$ . Next, we  
172 impose two conditions on the matrix  $C$ :

- 173 (i) Individuals must reside in either of the two patches, i.e.,  $c_{i1} + c_{i2} = 1$  for  $i=1$   
174 (Shincheonji) and 2 (non-Shincheonji).
- 175 (ii) The population in each patch remains constant, i.e.,  $c_{12}N_1 = c_{21}N_2$ , where  $N_1$  and  
176  $N_2$  represent population size for patch 1 and 2, respectively.

177 The above conditions may transform the contact matrix  $C$  to the following form:

178

179 
$$C = \begin{pmatrix} 1 - c_{12} & c_{12} \\ \frac{c_{12}N_1}{N_2} & 1 - \frac{c_{12}N_1}{N_2} \end{pmatrix}$$

180

181 containing only one unknown parameter  $c_{12}$ .



182

183 The force of infection for individuals from patch  $i$  at time  $t$ ,  $\lambda_i(t)$ , is defined as follows:

$$\lambda_i(t) = \sum_j c_{ij} \beta_j \frac{\sum_k c_{kj} (P_k(t) + A_k(t) + I_k(t))}{\sum_k c_{kj} N_k(t)}, \quad (3)$$

184 where  $\beta_j$  indicates local transmission rate in patch  $j$  and  $I_k(t)$  indicates number of infectious  
185 individuals from patch  $k$ .

186

187 The transitions between states are modeled using an explicit tau-leap algorithm (Gillespie, 2001) to  
188 account for stochasticity of the infection transmission process. The number of susceptible people in  
189 patch  $i$  at time  $t + \Delta t$ ,  $S_i(t + \Delta t)$ , is written as follows:

190

$$S_i(t + \Delta t) = S_i(t) - Q_i^{SE}(t, t + \Delta t). \quad (4)$$

191  $Q_i^{SE}(t, t + \Delta t)$  represents the number of people who transit from state  $S$  to state  $E$  from  $t$  to  $t + \Delta t$   
192 in patch  $i$  and is a random variable with binomial distribution:

$$\text{Bin}(S_i(t), \Delta t \lambda_i(t)). \quad (5)$$

193 That is, it is represented as an integer varying between 0 and  $S_i(t)$ . For states from which more than  
194 one potential transition exist (e.g.,  $P$  to either  $A$  or  $I$ ), multinomial distributions were applied. For  
195 instance, the number of people transit from  $P$  to either  $I$  or  $A$  are given as follows:

$$\text{Multi}(P_i(t), \Delta t \pi), \quad (6)$$

196 where  $\pi$  is a vector given as

197

$$\left( \frac{1-f}{1/\delta - 1/\epsilon}, \frac{f}{1/\delta - 1/\epsilon} \right). \quad (7)$$

198

199 The first element of  $\pi$  indicates a probability of transition from  $P$  to  $I$  and the second element  
200 indicates the probability of transition from  $P$  to  $A$ . The number of people in other states (i.e.,  
201  $E, A, I, C, R$ ) at time  $t$  can be described similarly. The model was implemented in a combination of R  
202 and C++ languages, in which the core transmission model part is expensive and was written in C++.  
203 All the computer codes that generate the results in this paper are available at the author's GitHub  
204 repository (Kim, 2021).

205

### 206 2.5. Modeling intervention program

207 To account for intensification of the intervention such as case isolation and contact tracing with  
208 subsequent testing during the outbreak, we assumed case isolation rate ( $1 /$  mean time between  
209 symptom onset and case isolation) and transmission rate of the infectious people per unit time change  
210 over time. Specifically, we assumed that the case isolation rate,  $\alpha(t)$ , starts increasing on February  
211 20 from the initial value of  $\alpha^{\text{init}}$  when 4,474 out of 9,334 Shincheonji members were identified and  
212 were asked to self-isolate. During model fitting, we let data suggest the duration of intervention,  $d$   
213 in day, which is the time required for the case isolation rate to reach its minimum,  $\alpha(t) = \alpha^{\text{final}}$  for  
214  $t > \text{February } 20 + d$ . We assumed that the mean time between symptom onset and case isolation  
215 linearly decreases over the intervention period  $d$ . In other words,  $\alpha(t)$  is formulated as follows:

216

$$\alpha(t) = \begin{cases} 0, & \text{if } t < \text{Feb } 17 \\ \alpha^{\text{init}}, & \text{if } \text{Feb } 17 \leq t < \text{Feb } 20 \\ \alpha^{\text{init}} + (t - \text{Feb } 20)(\alpha^{\text{init}} - \alpha^{\text{final}})/d, & \text{if } \text{Feb } 20 \leq t < \text{Feb } 20 + d \\ \alpha^{\text{final}}, & \text{if } \text{Feb } 20 + d \leq t \end{cases} \quad (8)$$

217

218 where  $\alpha^{\text{final}}$  is assumed to be 1 day based on the experiences in Busan City in Korea and  $\alpha(t)$  is  
219 assumed to be zero before February 17 when the index case was detected.

220

221 Similarly, transmission rate per unit time at time  $t$ ,  $\beta_i(t)$  for  $i = 1$  (Shincheonji members), 2 (non-  
222 Shincheonji people in Daegu City), is assumed to linearly decrease during the intervention period.

223

$$\beta_i(t) = \begin{cases} \beta_i^{\text{init}}, & \text{if } t < \text{Feb 20} \\ \beta_i^{\text{init}} - (t - \text{Feb20})(\beta_i^{\text{init}} - \beta_i^{\text{final}})/d, & \text{if Feb 20} \leq t < \text{Feb 20} + d \\ \beta_i^{\text{final}}, & \text{if Feb 20} + d \leq t \end{cases} \quad (9)$$

224 Here,  $\beta_i^{\text{init}}$  and  $\beta_i^{\text{final}}$  indicate the transmission rate per unit time before the intervention and after the  
225 intervention measures fully take effect, respectively. They can be derived once  $R_{0,i}$  and  $R^{\text{final}}$  are  
226 given as:

$$\beta_i^{\text{init}} = \frac{R_{0,i}}{\frac{1}{\delta} - \frac{1}{\epsilon} + \frac{f}{\gamma + \alpha\rho} + \frac{1-f}{\gamma + \alpha}} \quad (10)$$

and

$$\beta_i^{\text{final}} = \frac{R^{\text{final}}}{\frac{1}{\delta} - \frac{1}{\epsilon} + \frac{f}{\gamma + \alpha\rho} + \frac{1-f}{\gamma + \alpha}} \quad (11)$$

## 227 2.6. Parameter estimation

228 Our model of COVID-19 transmission requires 15 parameters (Table 1). We divided the model  
229 parameters into three classes depending on our belief on their relative certainty. The first class  
230 includes parameters related to the natural history of infection and population size and we deemed that  
231 available parameter estimates are reliable. For these parameters, we used their point estimates based  
232 on analyses of data on COVID-19 transmissions in Korea or China. For the second class, which  
233 includes parameters related to intervention programs, we used our best guesses based on supporting

234 evidence but still acknowledged their uncertainty. Therefore, we analyzed the models under various  
235 assumptions on their values within some pre-specified ranges. Finally, we defined six parameters that  
236 are critical for characterizing dynamics of COVID-19 transmission in Shincheonji members and non-  
237 Shincheonji people. We estimated these parameters by fitting the model to daily confirmed COVID-  
238 19 cases of Shincheonji members and non-Shincheonji people.

239

240 Estimation of parameters  $\theta = (R_{0,1}, R_{0,2}, I_0, c_{12}, d, R^{\text{final}})$  was based on Approximate Bayesian  
241 Computation Sequential Monte Carlo (ABC-SMC) (Minter and Retkute, 2019). The ABC is a method  
242 for approximating posterior distributions given data  $D$ ,  $p(\theta|D)$ , by accepting proposed parameter  
243 values when the difference between simulated data  $D^*$  and  $D$ ,  $d(D, D^*)$ , is smaller than tolerance  $\epsilon$ :

244 
$$p(\theta|D) \approx p(\theta|d(D, D^*) \leq \epsilon).$$

245 For our model,  $d(D, D^*)$  is defined as the sum of the squared differences in daily confirmed cases  
246 over the outbreak of duration  $T$  days, that is,

247 
$$d_i(D, D^*) = \sum_{t=1}^T (D_t - D_t^*)^2,$$

248 for Shincheonji ( $i = 1$ ) and non-Shincheonji ( $i = 2$ ). Here,  $D_t$  and  $D_t^*$  represent observed daily  
249 confirmed cases and model predicted values at time day  $t$ , respectively. ABC-SMC was designed to  
250 increase efficiency of the ABC method and ABC is applied in a sequential manner by constructing  
251 intermediate distributions, which converge to the posterior distribution. Tolerance  $\epsilon$  is gradually  
252 decreased and each intermediate distribution is obtained as a sample that is drawn with weights from  
253 the previous distribution and then perturbed through a kernel  $K(\theta|\theta^*)$ . The kernel helps keep the  
254 algorithm from being stuck in local optimum while maintaining the efficiency of the ABC-SMC

255 method. Minimally informative uniform distributions were used as prior distributions and estimation  
256 procedure was repeated for ten different random seeds. The resulting distribution was summarized as  
257 median, 50% credible intervals (CrI; interval between 25% and 75% percentiles) and 95% CrI  
258 (interval between 2.5% and 97.5% percentiles). More details of the algorithm such as prior  
259 distribution for each parameter, the number of steps, the tolerance values for each step, perturbation  
260 kernel appear in the Supplementary Material.

## 261 **3. Results**

### 262 *3.1 Doubling time*

263 Over the period of February 18 – March 5, during which doubling of confirmed cases occurred 12  
264 times, doubling times were <1 day in the beginning and increased subsequently with daily doubling  
265 time presenting higher variability for both Shincheonji and non-Shincheonji values (Table 2).  
266 Doubling times calculated over sliding one-week intervals remained shorter than 3 days for the most  
267 part for both Sincheonji and non-Shincheonji population.

### 268 *3.2 Comparison between observations and the mechanistic model*

269 Our fitted model projects the trajectory of number of daily and cumulative confirmed cases in  
270 Shincheonji and in the rest of the population of Daegu City (Figure 3(a)-(d)). The model correctly  
271 projects the decreasing trends in both patches after reaching the peak on around March 3, 2020.  
272 However, for the non-Shincheonji, daily new cases are underestimated toward the end of the outbreak.  
273  $R_0$  were estimated to be quite different across two patches (Figure 3(e)). The local reproduction  
274 number in the patch representing Shincheonji members,  $R_{0,1}$ , was estimated to be 8.54 [95% credible  
275 interval (CrI): 6.30, 10.95] whereas the local reproduction number in the patch representing non-  
276 Shincheonji members,  $R_{0,2}$ , was estimated to be 1.87 [95% CrI: 0.38, 4.40]. The time taken for the  
277 intervention program to have exerted highest effect,  $d$ , is around 9.02 days [95% CrI: 7.85, 10.45],  
278 which leads to both reduced transmission rate per unit time and reproduction numbers ( $R^{\text{final}} = 0.34$   
279 [95% CrI: 0.18, 0.53]). The model also suggests that there were infectious people already when the  
280 first cases was symptomatic on February 7 ( $I_0 = 4$  [95% CrI: 2, 11]). The proportion of time that a  
281 person from Shincheonji members spends mixing with non-Shincheonji people,  $c_{12}$ , was estimate be  
282 around 0.14 [95% CrI: 0.05, 0.22]. Posterior distribution of parameters based on 2,000 samples  
283 obtained from 10 different random seeds and two-way correlations appear in Supplementary Material  
284 (Figure S2).

285

286

## 287 4. Discussion

288 Rapid transmission of COVID-19 within the Shincheonji community is likely to have been facilitated  
289 by high intensity contact between individuals gathering during services and in residential areas. Our  
290 mathematical modeling analyses quantify the rapid spread of COVID-19 in Daegu City driven by a  
291 community of Shincheonji members. The median  $R_0$  among Shincheonji members ( $R_{0,1}$ ) was 8.5,  
292 which is over 4-fold higher than what was estimated for the rest of the population in Daegu City  
293 ( $R_{0,2}=1.9$ ). While the  $R_0$  in the Shincheonji community is higher than estimates from most  
294 transmission hotspots (e.g., in China (Alimohamadi et al., 2020; Imai et al., 2020; Riou and Althaus,  
295 2020; Wu et al., 2020; Zhao et al., 2020b) and Korea (Bae et al., 2020; Choi and Ki, 2020; Ki, 2020;  
296 Shim et al., 2020a)), such high  $R_0$  is not unusual in particular considering that  $R_0$  can be different  
297 depending on the local settings with varying contact rates (Temime et al., 2020). Studies do report  
298 that  $R_0$  estimates of COVID-19 that are comparable or even higher than our estimates for the  
299 Shincheonji community. During periods of intensive social contacts near the Chinese New Year in  
300 China,  $R_0$  was estimated to be 6 (Sanche et al., 2020; Tang et al., 2020). Also,  $R_0$  estimates were  
301 around 5 among those traveled from Wuhan and were subsequently confirmed in other countries  
302 (Zhao et al., 2020a), and around 7 during the initial growth phase in the UK (Dropkin, 2020). In an  
303 extreme setting such as the Diamond Princess ship, much higher estimates ( $R_0 = 14.8$ ) were reported  
304 (Rocklöv et al., 2020). Although the previous studies that included data on the outbreak in Shincheonji  
305 community report smaller  $R_0$  estimates (Choi and Ki, 2020; Shim et al., 2020a) than our estimates,  
306 the difference might stem from that prior studies did not model the Shincheonji community separately

307 from the rest of the population and therefore measured the  $R_0$  averaged across sub-population that  
308 are highly heterogeneous.

309

310 Although estimated daily doubling times show some variability (e.g., 14 days on February 28 and  
311 69.6 days on March 1 for the non-Shincheonji population), they are short overall, which indicates  
312 rapid growth of the outbreak, and are compatible with estimates from other settings. Daily doubling  
313 times were lower than one day in the beginning of the outbreak and this is similar to the estimates  
314 from several regions in China (Muniz-Rodriguez et al., 2020a). The study by Shim *et al.* (Shim et al.,  
315 2020b) used the dataset from Daegu City, Korea including Shincheonji population produced the  
316 doubling time of 2.8 days [95% CI: 2.5, 4.0]. Our daily doubling time estimates averaged over the  
317 period of February 18 – March 5 is 2.9 days and is consistent with the study. The period from February  
318 18 to March 5 is likely to have been used in the study by Shim *et al.* because the authors calculated  
319 the doubling times on the days when the reported cases doubled and during the period of February 18  
320 – March 5 the number of cases doubled 12 times and no further doubling occurred since then. The  
321 study by Lee *et al.* (Lee et al., 2020) used similar data, but reported seemingly inconsistent findings,  
322 doubling time of 2.9 days for the first week and 3.4 over the period around February 18 – March 4  
323 considering that our estimate averaged over the first week is 0.9 day. One likely reason for this  
324 difference is that Lee *et al.* calculated the doubling time using the cumulative incidence estimated  
325 from a logistic model that used the initial value (i.e., number of infected people on February 18) as a  
326 free parameter. Figure 2D from their study indicates that the number of infected people on 18  
327 February is much larger than 1 and this might have led to the higher doubling time than our estimates.



328 This may also explain why Lee *et al.* estimates for a similar period (i.e., February 18 – March 5) is  
329 higher than our estimates and those by Shim *et al.* (Shim et al., 2020b).

330

331 The relationship between the doubling time and the  $R_0$  provides two insights on our inferences on  
332  $R_0$ . For an *SEIR* model, there exists an algebraic formula that describes the inverse relationship  
333 between initial epidemic growth rate and  $R_0$  (Ma, 2020; Ma et al., 2014). This inverse relationship  
334 suggests that short doubling times during the early phase of the epidemic we calculated using the  
335 growth rates are consistent with high  $R_0$  for Shincheonji we estimated using the stochastic dynamic  
336 transmission model (Table S2 in the Supplementary Material). On the other hand, while doubling  
337 times may be reduced and imply high  $R_0$  for non-Shincheonji people as well, such short doubling  
338 times can arise through mixing (i.e., positive  $c_{12}$ ) with Shincheonji of high  $R_0$  even if the  $R_0$  for the  
339 non-Shincheonji people are not as high.

340

341 Parameters around asymptomatic infections of COVID-19 are largely unknown (Fox et al., 2020) and  
342 we tested the sensitivity of our inferences to our assumptions on two parameters related to  
343 asymptomatic infection, namely the proportion of asymptomatic infection,  $f$ , and relative rate of  
344 isolation of asymptomatic people,  $\rho$  (Figure S3 in Supplementary Material).  $R_0$  for Shincheonji  
345 people,  $R_{0,1}$ , and the final reproduction number,  $R^{\text{final}}$ , showed a slight increase with increasing  $f$   
346 or decreasing  $\rho$  while other parameter estimates remain relatively constant. We also tested the  
347 sensitivity of our parameter estimates to  $\alpha^{\text{final}}$ , maximum rate of isolation near the end of the  
348 outbreak.  $\alpha^{\text{final}}$  showed an inverse relationship with other intervention-related parameters such as

349 duration of intervention  $d$ , and reproduction number at the end of the outbreak,  $R^{\text{final}}$ . Overall, while  
350 there are some quantitative differences in our parameter estimates in response to the change in our  
351 assumptions on fixed parameters,  $R_{0,1}$  was always over 4-fold higher than  $R_{0,2}$ .

352

353 While the first case was confirmed on February 18 for the Shincheonji outbreak, it was later revealed  
354 that the first case had symptoms on February 7 and even earlier transmission events were also  
355 suspected (Korea Disease Control and Prevention Agency, 2020b). This finding is consistent with our  
356 model analyses, which suggest there were 4 [95% CrI: 2, 11] infectious people on February 7. These  
357 undetected cases are likely to have contributed to the explosive outbreak in the Shincheonji  
358 community. Studies suggest that a substantial fraction of all SARS-CoV-2 infections were undetected.  
359 For Korea, it was suggested that the number of undetected cases may be larger than the number of  
360 detected cases (Lee et al., 2021). A study suggests that  $> 80\%$  of all infections were undocumented  
361 during the initial spread in China (Li et al., 2020b). In France, over the period of 7 weeks since 28  
362 June 2020 after the first lockdown, it was estimated that around 93% of all symptomatic cases were  
363 undetected initially and later around 69% of symptomatic cases were undetected by the time when  
364 case ascertainment improved (Pullano et al., 2021).

365

366 We have shown that SARS-CoV 2 has disproportionately affected a religious community generating  
367 a large cluster of linked cases in Korea. Similar large clusters of cases in high-risk settings have been  
368 observed in Korea and elsewhere. In Korea, many similar outbreaks in high-risk settings have been  
369 reported in the news including the outbreak in a dance class (Jang et al., 2020) and a call center (Park

370 et al., 2020). In Singapore, a total of 247 cases were confirmed as of March 17, 2020 and six clusters  
371 including the spread in a hotel and in a church accounted for 45.3% of the total cases (Tariq et al.,  
372 2020). In Hong Kong, 1,038 cases were confirmed from January 23 to April 28, 2020 and among  
373 them, 51.3% of cases were associated with large clusters. Such social settings as bars, restaurants,  
374 weddings, and religious sites appeared at increased risk of large outbreaks (Adam et al., 2020).

375

376 One limitation of our analyses is that the model was fit to date of case confirmation because the date  
377 of symptom onset, which is more closely related with the date of infection, was not available. The  
378 daily number of confirmed cases can abruptly change depending on the intensity of intervention  
379 measures, of which the dynamics may not be consistent with disease transmission process. This means  
380 using the data on case confirmation under dynamics intervention measures is challenging. We tried  
381 to mitigate this difficulty by incorporating the dynamics of intervention programs by assuming that  
382 the start date and duration of enhanced case detection vary while the case detection rate increases  
383 over time and let the data suggest the values for those parameters.

384

## 385 **5. Conclusions**

386 The potential for large variations in  $R_0$  for COVID-19 has important implications for the design and  
387 effectiveness of control strategies. The efficacy of components of intervention programs, such as  
388 contact tracing and physical distancing, is dependent on various environmental and societal factors  
389 (e.g., large gatherings, physical proximity, high risk behaviors such as singing, etc.) that influence the  
390 transmissibility of disease. Our analyses provide important insights that in order to minimize the risk

391 of sudden outbreaks, efforts to identify and preempt high transmission scenarios will be key to  
392 controlling the spread of the COVID-19. Understanding and subsequently limiting the risk of  
393 transmission in high-risk places such as the Shincheonji Church cluster in Korea is key to effective  
394 control of COVID-19 transmission.

395

396 **Funding:** This research was partly supported by Government-wide R&D Fund project for infectious  
397 disease research (GFID), Republic of Korea (grant number: HG18C0088) and National Institute for  
398 Mathematical Sciences (NIMS) grant funded by the Korean Government (NIMS-B21910000).

399

400 **Acknowledgments:** All authors acknowledge discussions with the members of the Research and  
401 Development on Integrated Surveillance System Development for Early Warning of Infectious  
402 Diseases of Korea.

## 403 **6. References**

404 Adam, D.C., Wu, P., Wong, J.Y., Lau, E.H.Y., Tsang, T.K., Cauchemez, S., Leung, G.M., Cowling,  
405 B.J., 2020. Clustering and superspreading potential of SARS-CoV-2 infections in Hong Kong. *Nat*  
406 *Med* 26, 1714-1719.

407 Alimohamadi, Y., Taghdir, M., Sepandi, M., 2020. The Estimate of the Basic Reproduction Number  
408 for Novel Coronavirus disease (COVID-19): A Systematic Review and Meta-Analysis. *Korean J Prev*  
409 *Med* 0.

410 Anderson, R.M., Donnelly, C., Hollingsworth, D., Keeling, M., Vegvari, C., Baggaley, R., R, M.,  
411 2020. Reproduction number (R) and growth rate (r) of the COVID-19 epidemic in the UK: methods

412 of estimation, data sources, causes of heterogeneity, and use as a guide in policy formulation. The  
413 Royal Society.

414 Azman, A.S., Lessler, J., 2015. Reactive vaccination in the presence of disease hotspots. *Proc Biol*  
415 *Sci* 282, 20141341.

416 Bae, T.W., Kwon, K.K., Kim, K.H., 2020. Mass Infection Analysis of COVID-19 Using the SEIRD  
417 Model in Daegu-Gyeongbuk of Korea from April to May, 2020. *J Korean Med Sci* 35, e317.

418 Chan, J.F., Yuan, S., Kok, K.H., To, K.K., Chu, H., Yang, J., Xing, F., Liu, J., Yip, C.C., Poon, R.W.,  
419 Tsoi, H.W., Lo, S.K., Chan, K.H., Poon, V.K., Chan, W.M., Ip, J.D., Cai, J.P., Cheng, V.C., Chen,  
420 H., Hui, C.K., Yuen, K.Y., 2020. A familial cluster of pneumonia associated with the 2019 novel  
421 coronavirus indicating person-to-person transmission: a study of a family cluster. *Lancet* 395, 514-  
422 523.

423 Chen, M.K., Chevalier, J.A., Long, E.F., 2021. Nursing home staff networks and COVID-19. *Proc*  
424 *Natl Acad Sci U S A* 118.

425 Choe, S.-H., 2020. Shadowy Church Is at Center of Coronavirus Outbreak in South Korea, *The New*  
426 *York Times*.

427 Choi, S., Ki, M., 2020. Estimating the reproductive number and the outbreak size of COVID-19 in  
428 Korea. *Epidemiol Health* 42, e2020011.

429 Chung, E., Hill, A., 2020. [DEBRIEFING] What is the Shincheonji Church of Jesus and who are its  
430 members? And more importantly, what are its links to the coronavirus?, *Korea Joongang Daily*.

431 Dropkin, G., 2020. COVID-19 UK Lockdown Forecasts and R0. *Front Public Health* 8.

- 432 Ebell, M.H., Bagwell-Adams, G., 2020. Mandatory Social Distancing Associated With Increased  
433 Doubling Time: An Example Using Hyperlocal Data. *Am J Prev Med* 59, 140-142.
- 434 Fox, S.J., Pasco, R., Tec, M., Du, Z., Lachmann, M., Scott, J., Meyers, L.A., 2020. The impact of  
435 asymptomatic COVID-19 infections on future pandemic waves. medRxiv,  
436 2020.2006.2022.20137489.
- 437 Fu, L., Wang, B., Yuan, T., Chen, X., Ao, Y., Fitzpatrick, T., Li, P., Zhou, Y., Lin, Y.F., Duan, Q.,  
438 Luo, G., Fan, S., Lu, Y., Feng, A., Zhan, Y., Liang, B., Cai, W., Zhang, L., Du, X., Li, L., Shu, Y.,  
439 Zou, H., 2020. Clinical characteristics of coronavirus disease 2019 (COVID-19) in China: A  
440 systematic review and meta-analysis. *J Infect* 80, 656-665.
- 441 Gillespie, D.T., 2001. Approximate accelerated stochastic simulation of chemically reacting systems.  
442 *J Chem Phys* 115, 1716-1733.
- 443 Guan, W.J., Ni, Z.Y., Hu, Y., Liang, W.H., Ou, C.Q., He, J.X., Liu, L., Shan, H., Lei, C.L., Hui,  
444 D.S.C., Du, B., Li, L.J., Zeng, G., Yuen, K.Y., Chen, R.C., Tang, C.L., Wang, T., Chen, P.Y., Xiang,  
445 J., Li, S.Y., Wang, J.L., Liang, Z.J., Peng, Y.X., Wei, L., Liu, Y., Hu, Y.H., Peng, P., Wang, J.M.,  
446 Liu, J.Y., Chen, Z., Li, G., Zheng, Z.J., Qiu, S.Q., Luo, J., Ye, C.J., Zhu, S.Y., Zhong, N.S., 2020.  
447 Clinical Characteristics of Coronavirus Disease 2019 in China. *N Engl J Med* 382, 1708-1720.
- 448 Guirao, A., 2020. The Covid-19 outbreak in Spain. A simple dynamics model, some lessons, and a  
449 theoretical framework for control response. *Infectious Disease Modelling* 5, 652-669.
- 450 Imai, N., Cori, A., Dorigatti, I., Baguelin, M., Donnelly, C., Riley, S., Ferguson, N., 2020. Report 3:  
451 Transmissibility of 2019-nCoV.

452 Jang, S., Han, S.H., Rhee, J.Y., 2020. Cluster of Coronavirus Disease Associated with Fitness Dance  
453 Classes, South Korea. *Emerg Infect Dis* 26, 1917-1920.

454 Jones, N.R., Qureshi, Z.U., Temple, R.J., Larwood, J.P.J., Greenhalgh, T., Bourouiba, L., 2020. Two  
455 metres or one: what is the evidence for physical distancing in covid-19? *BMJ* 370, m3223.

456 Ki, M., 2020. Epidemiologic characteristics of early cases with 2019 novel coronavirus (2019-nCoV)  
457 disease in Korea.

458 Kim, J.-H., 2021. COVID\_Shincheonji, GitHub repository  
459 [https://github.com/kimfinale/COVID\\_Shincheonji](https://github.com/kimfinale/COVID_Shincheonji). GitHub.

460 Koopman, J., Simon, C., Jacquez, J., Joseph, J., Sattenspiel, L., Park, T., 1988. Sexual partner  
461 selectiveness effects on homosexual HIV transmission dynamics. *J Acquir Immune Defic Syndr*  
462 (1988) 1, 486-504.

463 Korea Disease Control and Prevention Agency, 2020a. Press release.

464 Korea Disease Control and Prevention Agency, 2020b. Press release (February 22).

465 Lee, C., Apio, C., Park, T., 2021. Estimation of Undetected Asymptomatic COVID-19 Cases in South  
466 Korea Using a Probabilistic Model. *Int J Environ Res Public Health* 18.

467 Lee, S., Castillo-Chavez, C., 2015. The role of residence times in two-patch dengue transmission  
468 dynamics and optimal strategies. *J Theor Biol* 374, 152-164.

469 Lee, W., Hwang, S.-S., Song, I., Park, C., Kim, H., Song, I.-K., Choi, H.M., Prifti, K., Kwon, Y.,  
470 Kim, J., Oh, S., Yang, J., Cha, M., Kim, Y., Bell, M.L., Kim, H., 2020. COVID-19 in South Korea:  
471 epidemiological and spatiotemporal patterns of the spread and the role of aggressive diagnostic tests  
472 in the early phase. *International Journal of Epidemiology* 49, 1106-1116.

473 Lemieux, J.E., Siddle, K.J., Shaw, B.M., Loreth, C., Schaffner, S.F., Gladden-Young, A., Adams, G.,  
474 Fink, T., Tomkins-Tinch, C.H., Krasilnikova, L.A., DeRuff, K.C., Rudy, M., Bauer, M.R., Lagerborg,  
475 K.A., Normandin, E., Chapman, S.B., Reilly, S.K., Anahtar, M.N., Lin, A.E., Carter, A., Myhrvold,  
476 C., Kemball, M.E., Chaluvadi, S., Cusick, C., Flowers, K., Neumann, A., Cerrato, F., Farhat, M.,  
477 Slater, D., Harris, J.B., Branda, J., Hooper, D., Gaeta, J.M., Baggett, T.P., O'Connell, J., Gnirke, A.,  
478 Lieberman, T.D., Philippakis, A., Burns, M., Brown, C.M., Luban, J., Ryan, E.T., Turbett, S.E.,  
479 LaRocque, R.C., Hanage, W.P., Gallagher, G.R., Madoff, L.C., Smole, S., Pierce, V.M., Rosenberg,  
480 E., Sabeti, P.C., Park, D.J., Maclnnis, B.L., 2020. Phylogenetic analysis of SARS-CoV-2 in the  
481 Boston area highlights the role of recurrent importation and superspreading events. medRxiv,  
482 2020.2008.2023.20178236.

483 Li, Q., Guan, X., Wu, P., Wang, X., Zhou, L., Tong, Y., Ren, R., Leung, K.S.M., Lau, E.H.Y., Wong,  
484 J.Y., Xing, X., Xiang, N., Wu, Y., Li, C., Chen, Q., Li, D., Liu, T., Zhao, J., Liu, M., Tu, W., Chen,  
485 C., Jin, L., Yang, R., Wang, Q., Zhou, S., Wang, R., Liu, H., Luo, Y., Liu, Y., Shao, G., Li, H., Tao,  
486 Z., Yang, Y., Deng, Z., Liu, B., Ma, Z., Zhang, Y., Shi, G., Lam, T.T.Y., Wu, J.T., Gao, G.F.,  
487 Cowling, B.J., Yang, B., Leung, G.M., Feng, Z., 2020a. Early Transmission Dynamics in Wuhan,  
488 China, of Novel Coronavirus-Infected Pneumonia. *N Engl J Med* 382, 1199-1207.

489 Li, R., Pei, S., Chen, B., Song, Y., Zhang, T., Yang, W., Shaman, J., 2020b. Substantial undocumented  
490 infection facilitates the rapid dissemination of novel coronavirus (SARS-CoV-2). *Science* 368, 489-  
491 493.



492 Lurie, M.N., Silva, J., Yorlets, R.R., Tao, J., Chan, P.A., 2020. Coronavirus Disease 2019 Epidemic  
493 Doubling Time in the United States Before and During Stay-at-Home Restrictions. *The Journal of*  
494 *Infectious Diseases* 222, 1601-1606.

495 Ma, J., 2020. Estimating epidemic exponential growth rate and basic reproduction number. *Infect Dis*  
496 *Model* 5, 129-141.

497 Ma, J., Dushoff, J., Bolker, B.M., Earn, D.J., 2014. Estimating initial epidemic growth rates. *Bull*  
498 *Math Biol* 76, 245-260.

499 Minter, A., Retkute, R., 2019. Approximate Bayesian Computation for infectious disease modelling.  
500 *Epidemics* 29, 100368.

501 Muniz-Rodriguez, K., Chowell, G., Cheung, C.-H., Jia, D., Lai, P.-Y., Lee, Y., Liu, M., Ofori, S.,  
502 Roosa, K., Simonsen, L., Viboud, C., Fung, I.C.-H., 2020a. Doubling Time of the COVID-19  
503 Epidemic by Province, China. *Emerg Infect Dis* 26, 1912.

504 Muniz-Rodriguez, K., Chowell, G., Cheung, C.-H., Jia, D., Lai, P.-Y., Lee, Y., Liu, M., Ofori, S.K.,  
505 Roosa, K.M., Simonsen, L., Viboud, C., Fung, I.C.-H., 2020b. Doubling Time of the COVID-19  
506 Epidemic by Province, China. *Emerging infectious diseases* 26, 1912-1914.

507 Myung, M.-j., 2020. Apartment block enters cohort isolation for the first time, THE DONG-A ILBO.

508 O’Driscoll, M., Ribeiro Dos Santos, G., Wang, L., Cummings, D.A.T., Azman, A.S., Paireau, J.,  
509 Fontanet, A., Cauchemez, S., Salje, H., 2021. Age-specific mortality and immunity patterns of SARS-  
510 CoV-2. *Nature* 590, 140-145.

511 Park, S.Y., Kim, Y.M., Yi, S., Lee, S., Na, B.J., Kim, C.B., Kim, J.I., Kim, H.S., Kim, Y.B., Park,  
512 Y., Huh, I.S., Kim, H.K., Yoon, H.J., Jang, H., Kim, K., Chang, Y., Kim, I., Lee, H., Gwack, J., Kim,

- 513 S.S., Kim, M., Kweon, S., Choe, Y.J., Park, O., Park, Y.J., Jeong, E.K., 2020. Coronavirus Disease  
514 Outbreak in Call Center, South Korea. *Emerg Infect Dis* 26, 1666-1670.
- 515 Patel, S.B., Patel, P., 2020. Doubling Time and its Interpretation for COVID 19 Cases. *Natl J*  
516 *Community Med* 11, 141-143.
- 517 Pullano, G., Di Domenico, L., Sabbatini, C.E., Valdano, E., Turbelin, C., Debin, M., Guerrisi, C.,  
518 Kengne-Kuetché, C., Souty, C., Hanslik, T., Blanchon, T., Boëlle, P.Y., Fignon, J., Vaux, S.,  
519 Campèse, C., Bernard-Stoecklin, S., Colizza, V., 2021. Underdetection of cases of COVID-19 in  
520 France threatens epidemic control. *Nature* 590, 134-139.
- 521 Riou, J., Althaus, C.L., 2020. Pattern of early human-to-human transmission of Wuhan 2019 novel  
522 coronavirus (2019-nCoV), December 2019 to January 2020. *Euro Surveill* 25.
- 523 Rocklöv, J., Sjödin, H., Wilder-Smith, A., 2020. COVID-19 outbreak on the Diamond Princess cruise  
524 ship: estimating the epidemic potential and effectiveness of public health countermeasures. *J Travel*  
525 *Med* 27.
- 526 Rothe, C., Schunk, M., Sothmann, P., Bretzel, G., Froeschl, G., Wallrauch, C., Zimmer, T., Thiel, V.,  
527 Janke, C., Guggemos, W., Seilmaier, M., Drosten, C., Vollmar, P., Zwirgmaier, K., Zange, S.,  
528 Wölfel, R., Hoelscher, M., 2020. Transmission of 2019-nCoV Infection from an Asymptomatic  
529 Contact in Germany. *New England Journal of Medicine* 382, 970-971.
- 530 Russell, T.W., Hellewell, J., Jarvis, C.I., van Zandvoort, K., Abbott, S., Ratnayake, R., Cmmid Covid-  
531 Working, G., Flasche, S., Eggo, R.M., Edmunds, W.J., Kucharski, A.J., 2020. Estimating the infection  
532 and case fatality ratio for coronavirus disease (COVID-19) using age-adjusted data from the outbreak  
533 on the Diamond Princess cruise ship, February 2020. *Euro Surveill* 25.

534 Sanche, S., Lin, Y.T., Xu, C., Romero-Severson, E., Hengartner, N., Ke, R., 2020. The Novel  
535 Coronavirus, 2019-nCoV, is Highly Contagious and More Infectious Than Initially Estimated.  
536 medRxiv, 2020.2002.2007.20021154.

537 Shim, E., Tariq, A., Choi, W., Lee, Y., Chowell, G., 2020a. Transmission potential and severity of  
538 COVID-19 in South Korea. *Int J Infect Dis* 93, 339-344.

539 Shim, E., Tariq, A., Chowell, G., 2020b. Spatial variability in reproduction number and doubling time  
540 across two waves of the COVID-19 pandemic in South Korea, February to July, 2020. *Int J Infect*  
541 *Dis* 102, 1-9.

542 Tang, B., Wang, X., Li, Q., Bragazzi, N.L., Tang, S., Xiao, Y., Wu, J., 2020. Estimation of the  
543 Transmission Risk of the 2019-nCoV and Its Implication for Public Health Interventions. *J Clin Med*  
544 9.

545 Tariq, A., Lee, Y., Roosa, K., Blumberg, S., Yan, P., Ma, S., Chowell, G., 2020. Real-time monitoring  
546 the transmission potential of COVID-19 in Singapore, March 2020. *BMC Med* 18, 166.

547 Temime, L., Gustin, M.-P., Duval, A., Buetti, N., Crépey, P., Guillemot, D., Thiébaud, R., Vanhems,  
548 P., Zahar, J.-R., Smith, D.R.M., Opatowski, L., 2020. A Conceptual Discussion About the Basic  
549 Reproduction Number of Severe Acute Respiratory Syndrome Coronavirus 2 in Healthcare Settings.  
550 *Clinical Infectious Diseases*.

551 Wu, J.T., Leung, K., Leung, G.M., 2020. Nowcasting and forecasting the potential domestic and  
552 international spread of the 2019-nCoV outbreak originating in Wuhan, China: a modelling study.  
553 *Lancet*.

554 Xu, X.K., Liu, X.F., Wu, Y., Ali, S.T., Du, Z., Bosetti, P., Lau, E.H.Y., Cowling, B.J., Wang, L.,  
555 2020. Reconstruction of Transmission Pairs for Novel Coronavirus Disease 2019 (COVID-19) in  
556 Mainland China: Estimation of Superspreading Events, Serial Interval, and Hazard of Infection.  
557 Yonhap, 2020. 'Shincheonji' suspected as coronavirus hotbed, The Korea Times.

558 Yu, P., Zhu, J., Zhang, Z., Han, Y., 2020. A Familial Cluster of Infection Associated With the 2019  
559 Novel Coronavirus Indicating Possible Person-to-Person Transmission During the Incubation Period.  
560 J Infect Dis 221, 1757-1761.

561 Zhao, Q., Chen, Y., Small, D.S., 2020a. Analysis of the epidemic growth of the early 2019-nCoV  
562 outbreak using internationally confirmed cases. medRxiv, 2020.2002.2006.20020941.

563 Zhao, S., Lin, Q., Ran, J., Musa, S.S., Yang, G., Wang, W., Lou, Y., Gao, D., Yang, L., He, D., Wang,  
564 M.H., 2020b. Preliminary estimation of the basic reproduction number of novel coronavirus (2019-  
565 nCoV) in China, from 2019 to 2020: A data-driven analysis in the early phase of the outbreak. Int J  
566 Infect Dis 92, 214-217.

567

## Supplementary Material

**Title:** Rapid transmission of coronavirus disease 2019 within a religious sect in South Korea: a mathematical modeling study

**Authors:** Jong-Hoon Kim<sup>1\*</sup>, Hyojung Lee<sup>2+</sup>, Yong Sul Won<sup>2+</sup>, Woo-Sik Son<sup>2</sup>, and Justin Im<sup>1</sup>

<sup>1</sup>International Vaccine Institute, Seoul, South Korea

<sup>2</sup>National Institute for Mathematical Sciences, Daejeon, South Korea

### Data source

Figure S1 shows the cumulative cases before and after imputation. We used the cubic spline method provided in the `imputeTS` package of R.

**Figure S1.** Cumulative number of cases in Shincheonji community and the overall Daegu before (left panel) and after imputation (right panel).

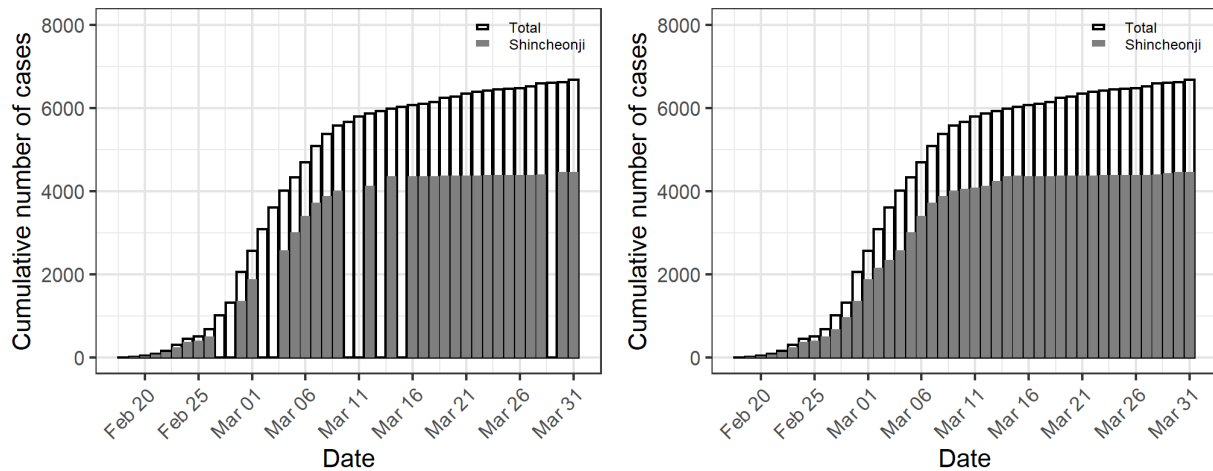

### Model equations

The model is implemented using a tau-leap algorithm. The number of people who transit from state  $x$  to state  $y$  over the time interval from  $t$  to  $t + \Delta t$  in patch  $i$ ,  $Q_i^{xy}(t, t + \Delta t)$ , is defined as follows:

$$Q_i^{SE}(t, t + \Delta t) = \text{Bin}(S_i(t), \lambda_i(t)\Delta t),$$

where  $\text{Bin}(n, p)$  represents binomial and with parameters  $n$  and  $p$ , respectively.

$$Q_i^{EP}(t, t + \Delta t) = \text{Bin}(E_i(t), \epsilon\Delta t),$$

$$Q_i^{Px}(t, t + \Delta t) = \text{Mult}(P_i(t), \pi),$$

where  $\text{Multi}(n, \pi = \{\pi_1, \pi_2\})$  indicates multinomial distribution with parameters  $n$  and  $\pi$ .  $\pi$  is given as follows:

$$\pi = \left\{ \left( \frac{1}{1/\delta - 1/\epsilon} \right) (1 - f), \left( \frac{1}{1/\delta - 1/\epsilon} \right) f \right\}.$$

The first element of  $\pi$  indicates a probability for  $x = I$  (i.e., transition from  $P$  to  $I$ ) and the second element indicates the probability of transition from  $P$  to  $A$  ( $x = A$ ). (1)

$$Q_i^{Ix}(t, t + \Delta t) = \text{Mult}(I_i(t), \pi),$$

$$\pi = \{\Delta t\alpha(t), \Delta t\gamma\},$$

The first element of  $\pi$  indicates a probability for  $x = C$  (i.e., transition from  $I$  to  $C$ ) and the second element indicates the probability of transition from  $I$  to  $R$  ( $x = R$ ).

$$Q_i^{Ax}(t, t + \Delta t) = \text{Mult}(A_i(t), \pi),$$

$$\pi = \{\Delta t\alpha(t), \Delta t\gamma\}.$$

The first element of  $\pi$  indicates a probability for  $x = C$  (i.e., transition from  $A$  to  $C$ ) and the second element indicates the probability of transition from  $A$  to  $R$  ( $x = R$ ).

The number of people in each state at time  $t + \Delta t$  can be described using the terms defined above:

$$S_i(t + \Delta t) = S_i(t) - Q_i^{SE}(t, t + \Delta t),$$

$$E_i(t + \Delta t) = E_i(t) + Q_i^{SE}(t, t + \Delta t) - Q_i^{EP}(t, t + \Delta t),$$

$$P_i(t + \Delta t) = P_i(t) + Q_i^{EP}(t, t + \Delta t) - Q_i^{PA}(t, t + \Delta t) - Q_i^{PI}(t, t + \Delta t),$$

$$A_i(t + \Delta t) = A_i(t) + Q_i^{PA}(t, t + \Delta t) - Q_i^{AC}(t, t + \Delta t) - Q_i^{AR}(t, t + \Delta t),$$

$$I_i(t + \Delta t) = I_i(t) + Q_i^{PI}(t, t + \Delta t) - Q_i^{IC}(t, t + \Delta t) - Q_i^{IR}(t, t + \Delta t),$$

$$C_i(t + \Delta t) = C_i(t) + Q_i^{IC}(t, t + \Delta t) + Q_i^{AC}(t, t + \Delta t) - Q_i^{CR}(t, t + \Delta t),$$

$$R_i(t + \Delta t) = R_i(t) + Q_i^{AR}(t, t + \Delta t) + Q_i^{IR}(t, t + \Delta t) + Q_i^{CR}(t, t + \Delta t).$$

The model comprises two sets of above equations that describe two patches (i.e., a community of Shincheonji members and the non-Shincheonji people in Daegu City) and these equations are linked through the force of infection function,  $\lambda(t)$ , which is defined in the main text.

Table S1. Delay from onset of symptoms to isolation during the COVID-19 outbreak in Busan City, Korea.

| Date      | Median | Mean | Number of cases |
|-----------|--------|------|-----------------|
| 2/6/2020  | 17.0   | 17.0 | 1               |
| 2/16/2020 | 8.0    | 8.0  | 1               |
| 2/17/2020 | 5.5    | 5.5  | 2               |
| 2/19/2020 | 4.0    | 3.7  | 7               |
| 2/20/2020 | 2.5    | 2.6  | 8               |
| 2/21/2020 | 1.5    | 2.2  | 6               |
| 2/22/2020 | 1.0    | 2.0  | 9               |
| 2/23/2020 | 2.0    | 1.8  | 4               |
| 2/24/2020 | 0.0    | 0.7  | 3               |
| 2/25/2020 | 1.5    | 1.5  | 2               |
| 2/26/2020 | 1.5    | 1.8  | 4               |
| 2/27/2020 | 1.0    | 2.0  | 3               |
| 2/28/2020 | 3.0    | 2.3  | 3               |
| 2/29/2020 | 6.0    | 6.0  | 2               |
| 3/1/2020  | 2.0    | 2.0  | 1               |
| 3/2/2020  | 3.0    | 3.0  | 1               |
| 3/4/2020  | 3.0    | 3.0  | 1               |
| 3/6/2020  | 8.0    | 8.0  | 1               |
| 3/9/2020  | 3.0    | 3.0  | 2               |
| 3/12/2020 | 1.0    | 1.0  | 1               |
| 4/8/2020  | 10.0   | 10.0 | 1               |
| 5/6/2020  | 3.5    | 3.5  | 2               |
| 5/10/2020 | 2.0    | 2.0  | 1               |
| 5/27/2020 | 2.0    | 2.0  | 1               |

\*Number of isolated cases

## Model fitting

A pseudocode for Approximate Bayesian Computation Sequential Monte Carlo (ABC-SMC) is presented below adopting what was presented in the previous study (Minter and Retkute, 2019):

1. Set the number of generations  $G$  and the number of particles  $N$

2. Set the tolerance schedule  $\epsilon_1 < \epsilon_2 < \epsilon_3 < \dots < \epsilon_G$  and set the generation indicator  $g = 1$
3. Set the particle indicator  $i = 1$
4. If  $g = 1$ , sample  $\theta^{**}$  from the prior distribution  $p(\theta)$ . If  $g > 1$ , sample  $\theta^*$  from the previous generation  $\{\theta_{g-1}\}$  with weights  $\{w_{g-1}\}$  and perturb the particle to obtain  $\theta^{**} \sim K(\theta|\theta^*)$
5. If  $p(\theta^{**}) = 0$ , return to Step 4.
6. Generate  $n$  data sets  $D_j^{**}$  from the model using  $\theta^{**}$  and calculate

$$\hat{p}(D|D^{**}) = \frac{1}{n} \sum_{j=1}^n 1(d(D, D_j^{**}) \leq \epsilon_g).$$

7. If  $\hat{p}(D|D^{**}) = 0$ , return to Step 4
8. Set  $\theta_g^{(i)} = \theta^{**}$  and calculate the corresponding weight of the accepted particle  $i$

$$w_g^{(i)} = \begin{cases} \hat{p}(D|D^{**})p(\theta^{**}), & \text{if } g = 1 \\ \frac{\hat{p}(D|D^{**})p(\theta^{**})}{\left(\sum_{j=1}^N w_{g-1}^{(j)} K\left(\theta_g^{(i)}|\theta_{g-1}^{(j)}\right)\right)}, & \text{if } g > 1 \end{cases}$$

9. If  $i < N$ , increment  $i = i + 1$  and go to step 4.
10. Normalize the weights so that  $\sum_{i=1}^N w_g^{(i)} = 1$
11. If  $g < G$ , set  $g = g + 1$ , go to step 3

$K(\theta|\theta^*)$  was assumed to follow a multivariate normal distribution that was truncated to give only positive values. Twenty generations (i.e.,  $G = 20$ ) were used with the following tolerance for Shincheonji ( $\epsilon_{1..G}^1$ ) and non-Shincheonji ( $\epsilon_{1..G}^2$ ):

Initial tolerance values  $\epsilon_1^s$  were set as

$$\sqrt{\sum_{j=1}^n (2 * y_{s,j})^2},$$

where  $y_j$  represent incidence of confirmed case on day  $j$  for Shincheonji ( $s = 1$ ) and non-Shincheonji ( $s = 2$ ), respectively.  $\epsilon_{2..20}^s$  values were determined by setting the minimum values,  $\epsilon_{20}^s$ , as  $0.06 \times \epsilon_1^s$  and dividing 20 equidistance pieces. Finally, final two value were manually adjusted to provide good fit between data and the model predictions through trial and error. Below are actual values used but were rounded for presentation.

$$\epsilon_{1..G}^1 = \{2140, 2035, 1928, 1823, 1717, 1611, 1505, 1399, 1293, 1187, 1081, 975, 869, 764, 658, 552, 446, 340, 290, 250\}, \epsilon_{1..G}^2 = \{1325, 1260, 1194, 1129, 1063, 998, 932, 867, 801, 736, 670, 604, 539, 473, 408, 342, 277, 211, 190, 180\}.$$



Prior distributions for the parameters  $\theta = (R_{0,1}, R_{0,2}, I_0, c_{12}, d, R^{\text{final}})$  were defined as uniform distribution as follows:  $R_{0,1} \sim U(1, 20)$ ,  $R_{0,2} \sim U(1, 20)$ ,  $I_0 \sim U(1, 20)$ ,  $c_{12} \sim U(0.000001, 1)$ ,  $d \sim U(1, 30)$ ,  $R^{\text{final}} \sim U(1, 20)$ .

**Figure S2.** Posterior distribution of model parameters ( $n=2000$ ). For each of 10 random seeds, 200 samples were generated.

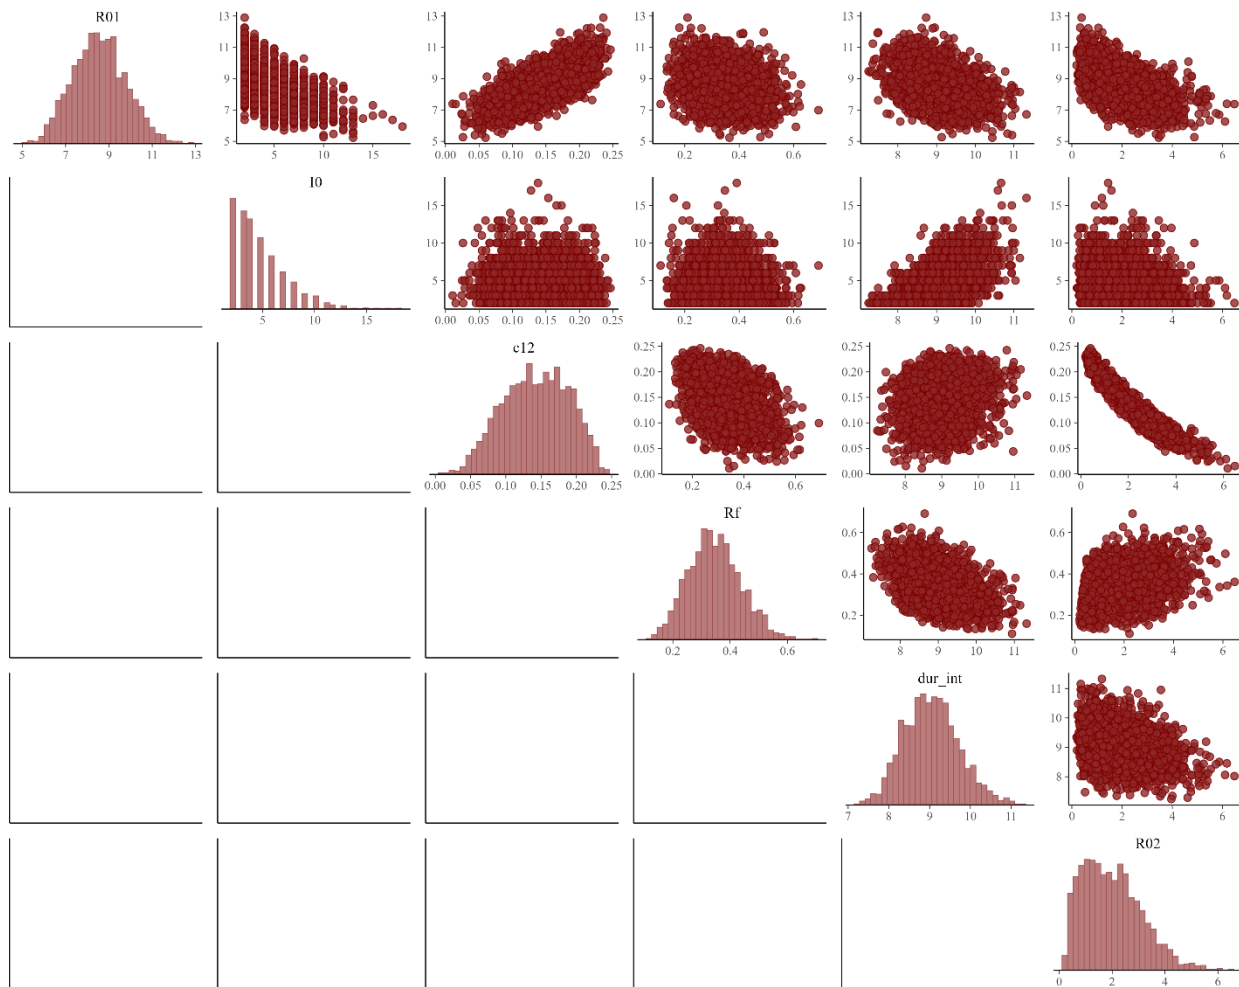

## Growth rate $r$ and basic reproduction number $R_0$

For the differential equation-based *SIR* model, the initial (*i.e.*, the entire population is susceptible) epidemic growth rate  $r^*$  can be given as  $\beta - \gamma$  (Ma, 2020), where  $\beta$  and  $\gamma$  represent transmission rate and recovery rate, respectively, as we defined in our model. Similarly, for a differential equation-based *SEIR* model  $r^*$  is given as below (Ma, 2020; Ma et al., 2014):

$$r^* = \frac{1}{2} \left[ -(\epsilon + \gamma) + \sqrt{(\epsilon - \gamma)^2 + 4\beta\epsilon} \right],$$

where  $\epsilon$  represent the rate at which the exposed individuals become infectious (*i.e.*,  $\frac{1}{\epsilon}$  = mean latent period) as we defined in the main text. The above equation gives  $\beta$  and therefore  $R_0$  for given  $r^*$ ,  $\gamma$ ,  $\epsilon$ . Assuming  $r^* = r$ , which is the growth rate we calculated in the main text, we can see to what value of  $R_0$  the doubling times we calculated in the main text are translated and qualitatively see if  $R_0$  estimates from the current study are reasonable.

Table S2. Basic reproduction number,  $R_0$ , calculated by assuming the empirical daily or weekly growth rate  $r$  is the same as the  $r^*$  calculated for the SEIR model.

| Date       | * $R_0$ calculated from the daily doubling time |                 | $R_0$ calculated from the weekly rolling doubling time |                 |
|------------|-------------------------------------------------|-----------------|--------------------------------------------------------|-----------------|
|            | Shincheonji                                     | Non-Shincheonji | Shincheonji                                            | Non-Shincheonji |
| 2020-02-18 | -                                               | -               | -                                                      | -               |
| 2020-02-19 | 116.0                                           | -               | -                                                      | -               |
| 2020-02-20 | 33.0                                            | 51.6            | -                                                      | -               |
| 2020-02-21 | 24.7                                            | 17.0            | -                                                      | -               |
| 2020-02-22 | 17.8                                            | 4.1             | -                                                      | -               |
| 2020-02-23 | 14.0                                            | 35.0            | -                                                      | -               |
| 2020-02-24 | 9.5                                             | 2.1             | -                                                      | -               |
| 2020-02-25 | 1.9                                             | 6.3             | 23.5                                                   |                 |
| 2020-02-26 | 3.8                                             | 15.4            | 12.9                                                   | 15.1            |
| 2020-02-27 | 5.8                                             | 15.3            | 9.7                                                    | 11.6            |
| 2020-02-28 | 6.6                                             | 1.5             | 7.7                                                    | 9.0             |
| 2020-02-29 | 6.6                                             | 16.7            | 6.4                                                    | 10.8            |
| 2020-03-01 | 6.1                                             | 1.1             | 5.5                                                    | 6.8             |
| 2020-03-02 | 2.7                                             | 5.2             | 4.6                                                    | 7.4             |
| 2020-03-03 | 1.9                                             | 5.7             | 4.6                                                    | 7.3             |

|            |     |     |     |     |
|------------|-----|-----|-----|-----|
| 2020-03-04 | 2.1 | 2.5 | 4.3 | 5.6 |
| 2020-03-05 | 2.4 | 1.8 | 3.8 | 4.0 |

---

**Figure S3.** Sensitivity of our parameter estimates to simplifying assumption of three selected parameters

1) Fraction of asymptomatic infection  $f$

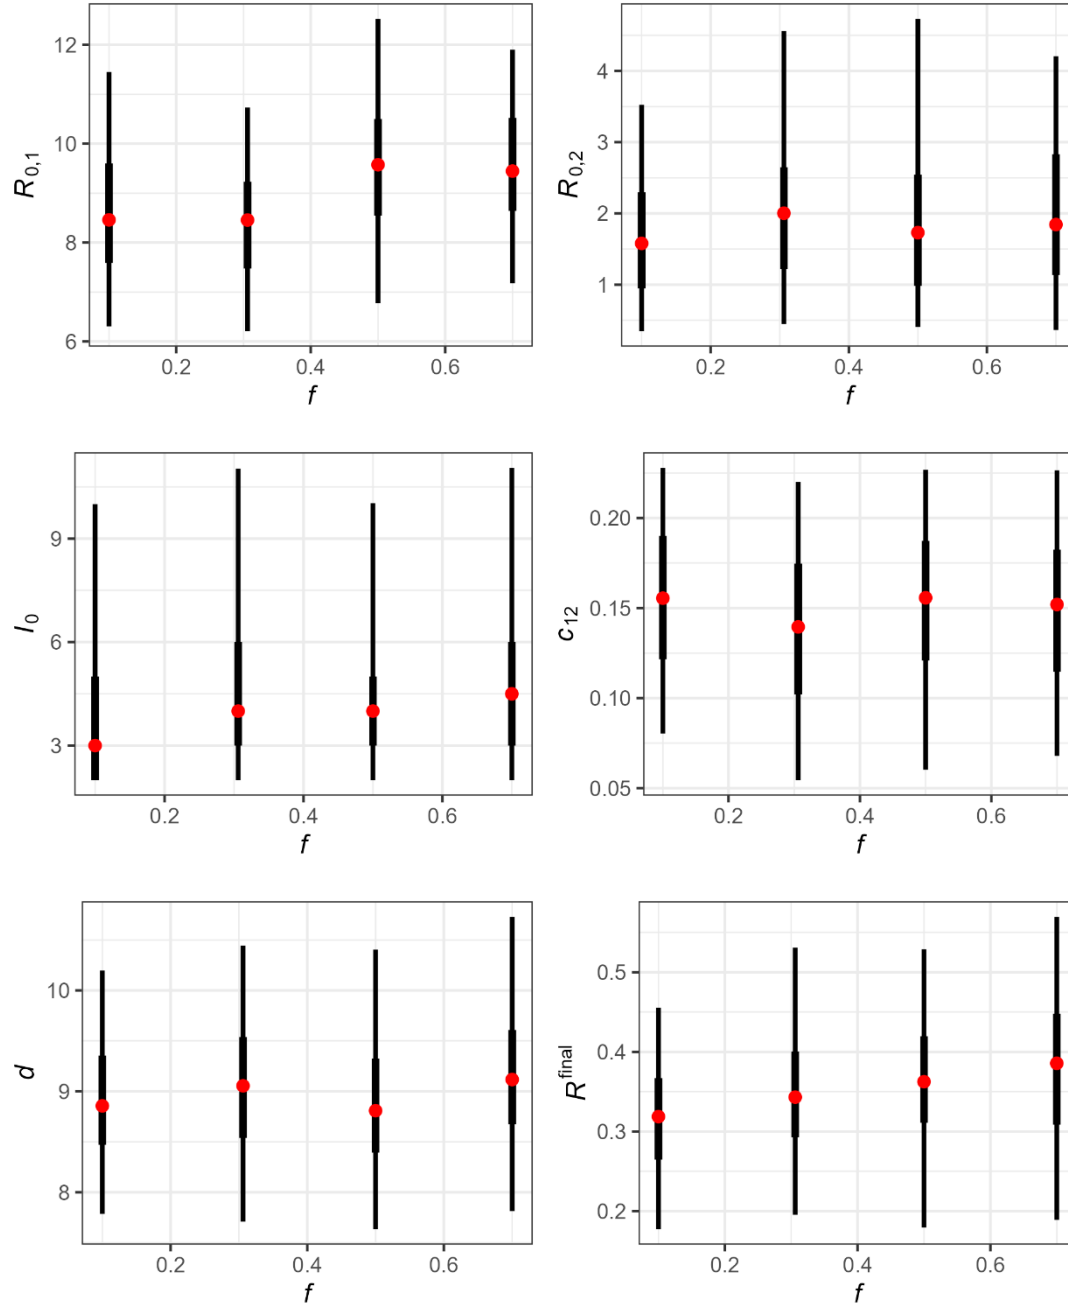

2) Relative rate  $\rho$  of isolation of asymptomatic patients compared to the symptomatic patients before the intervention.

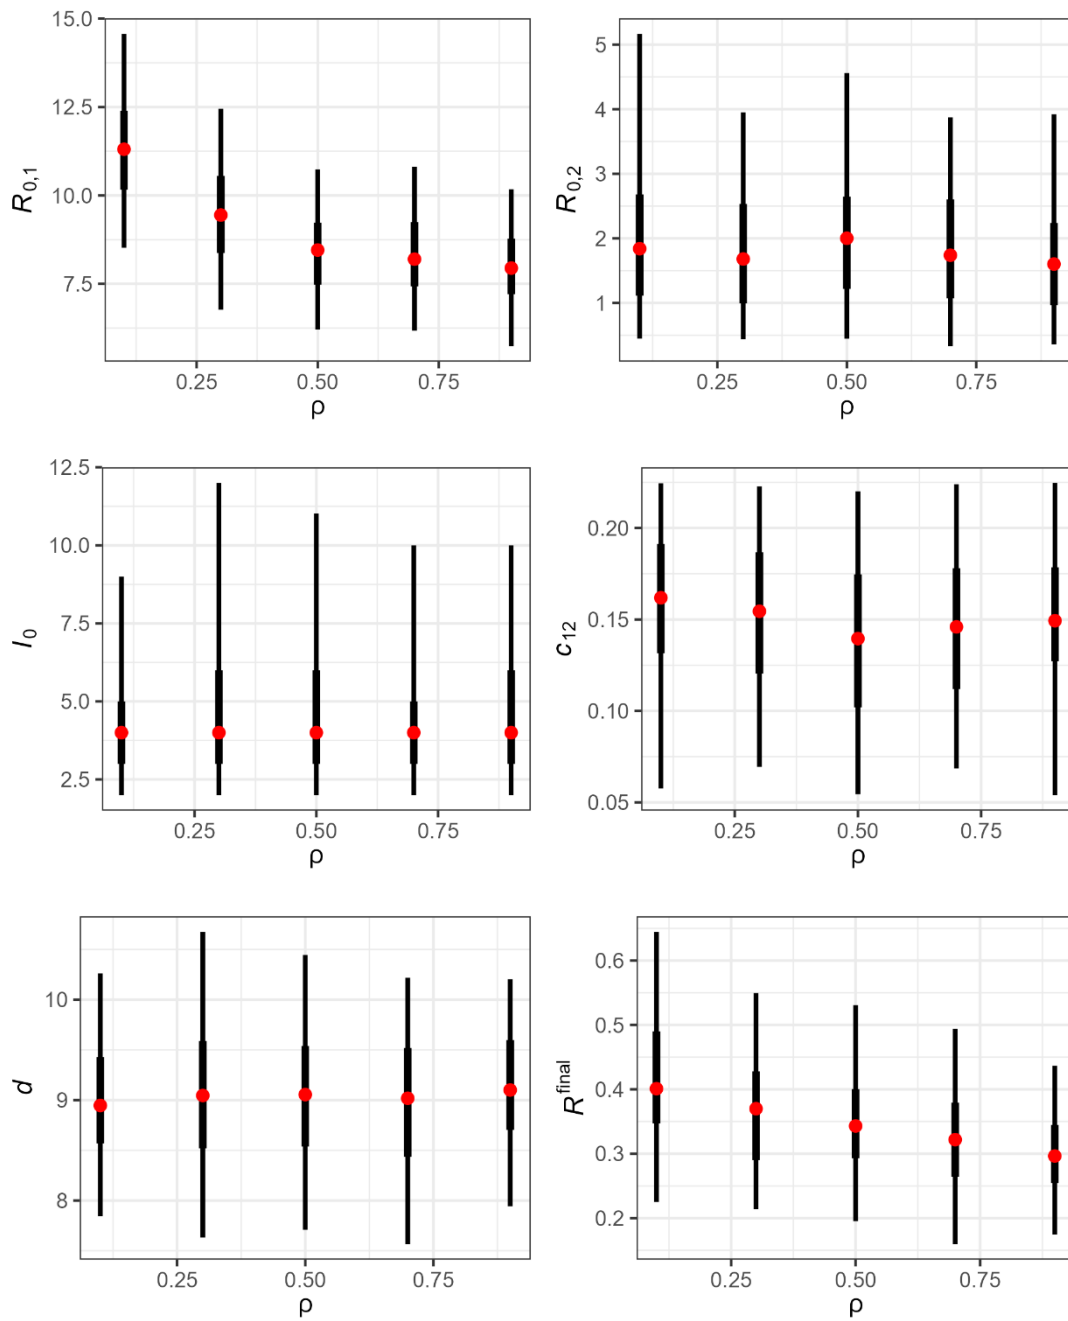

3) Time from symptom onset to isolation during the peak of the intervention,  $1/\alpha^{\text{final}}$

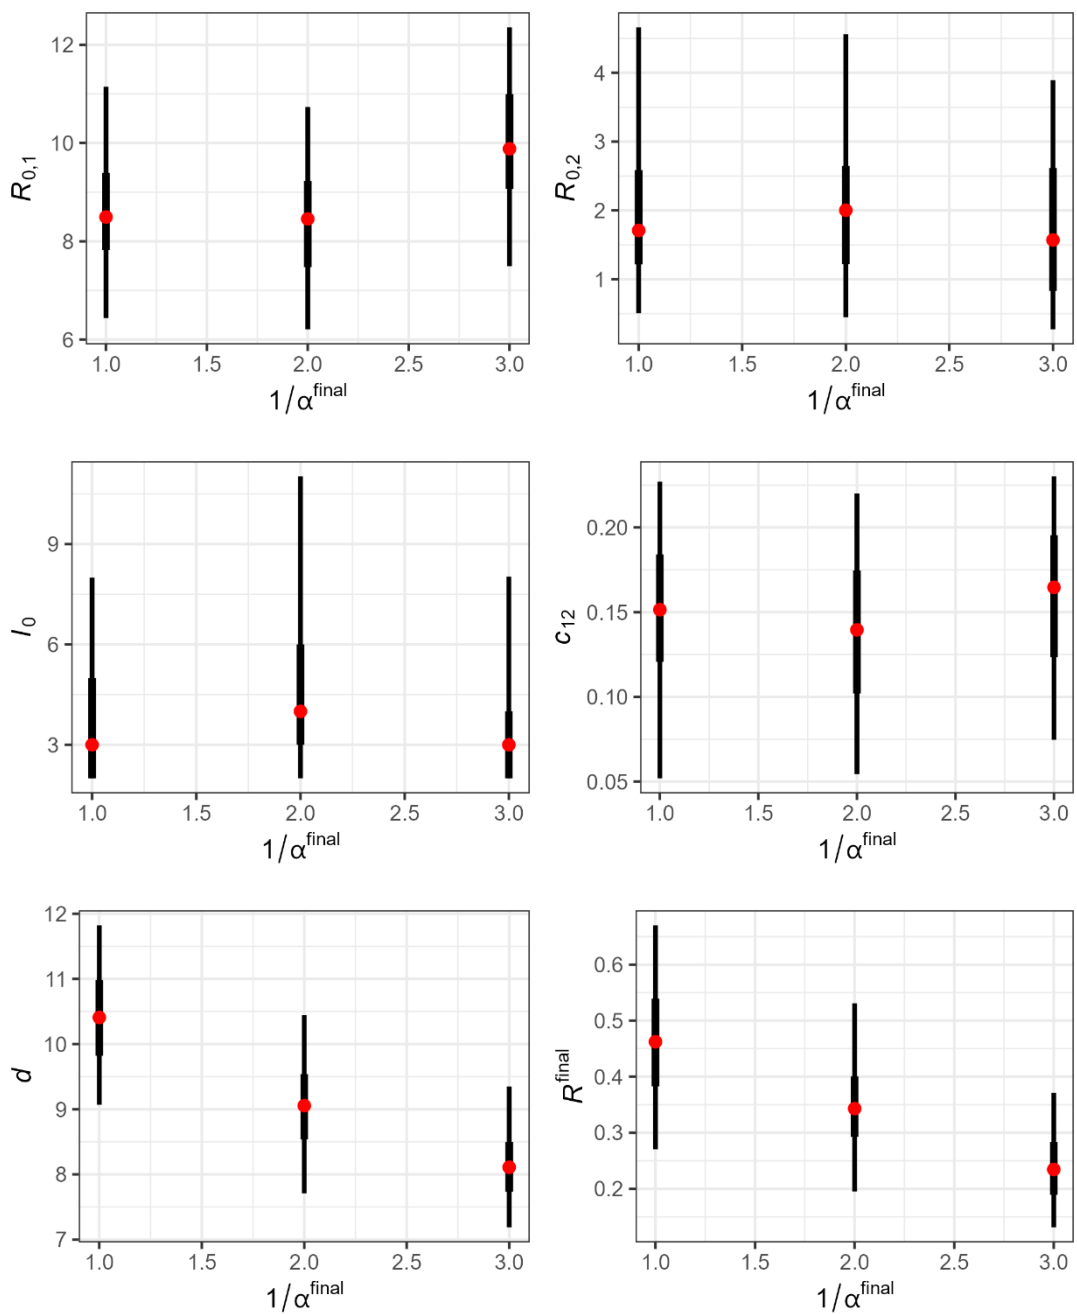

## References

- Ma, J., 2020. Estimating epidemic exponential growth rate and basic reproduction number. *Infect Dis Model* 5, 129-141.
- Ma, J., Dushoff, J., Bolker, B.M., Earn, D.J., 2014. Estimating initial epidemic growth rates. *Bull Math Biol* 76, 245-260.

Minter, A., Retkute, R., 2019. Approximate Bayesian Computation for infectious disease modelling. *Epidemics* 29, 100368.
